# Supplementary material for: Investigation of an extreme rainfall event during 8–12 December 2018 over central Vietnam – Part 1: Analysis and cloud-resolving simulation
Source: Copernicus journal article supplement (doi:10.5194/nhess-23-771-2023), 2023-02-22
Supplement: Supplementary file 1 [file nhess-23-771-2023-supplement.pdf]

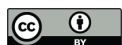

*Supplement of*

## **Investigation of an extreme rainfall event during 8–12 December 2018 over central Vietnam – Part 1: Analysis and cloud-resolving simulation**

**Chung-Chieh Wang and Duc Van Nguyen**

*Correspondence to:* Duc Van Nguyen ([nguyenvanduc\\_t57@hus.edu.vn](mailto:nguyenvanduc_t57@hus.edu.vn))

The copyright of individual parts of the supplement might differ from the article licence.

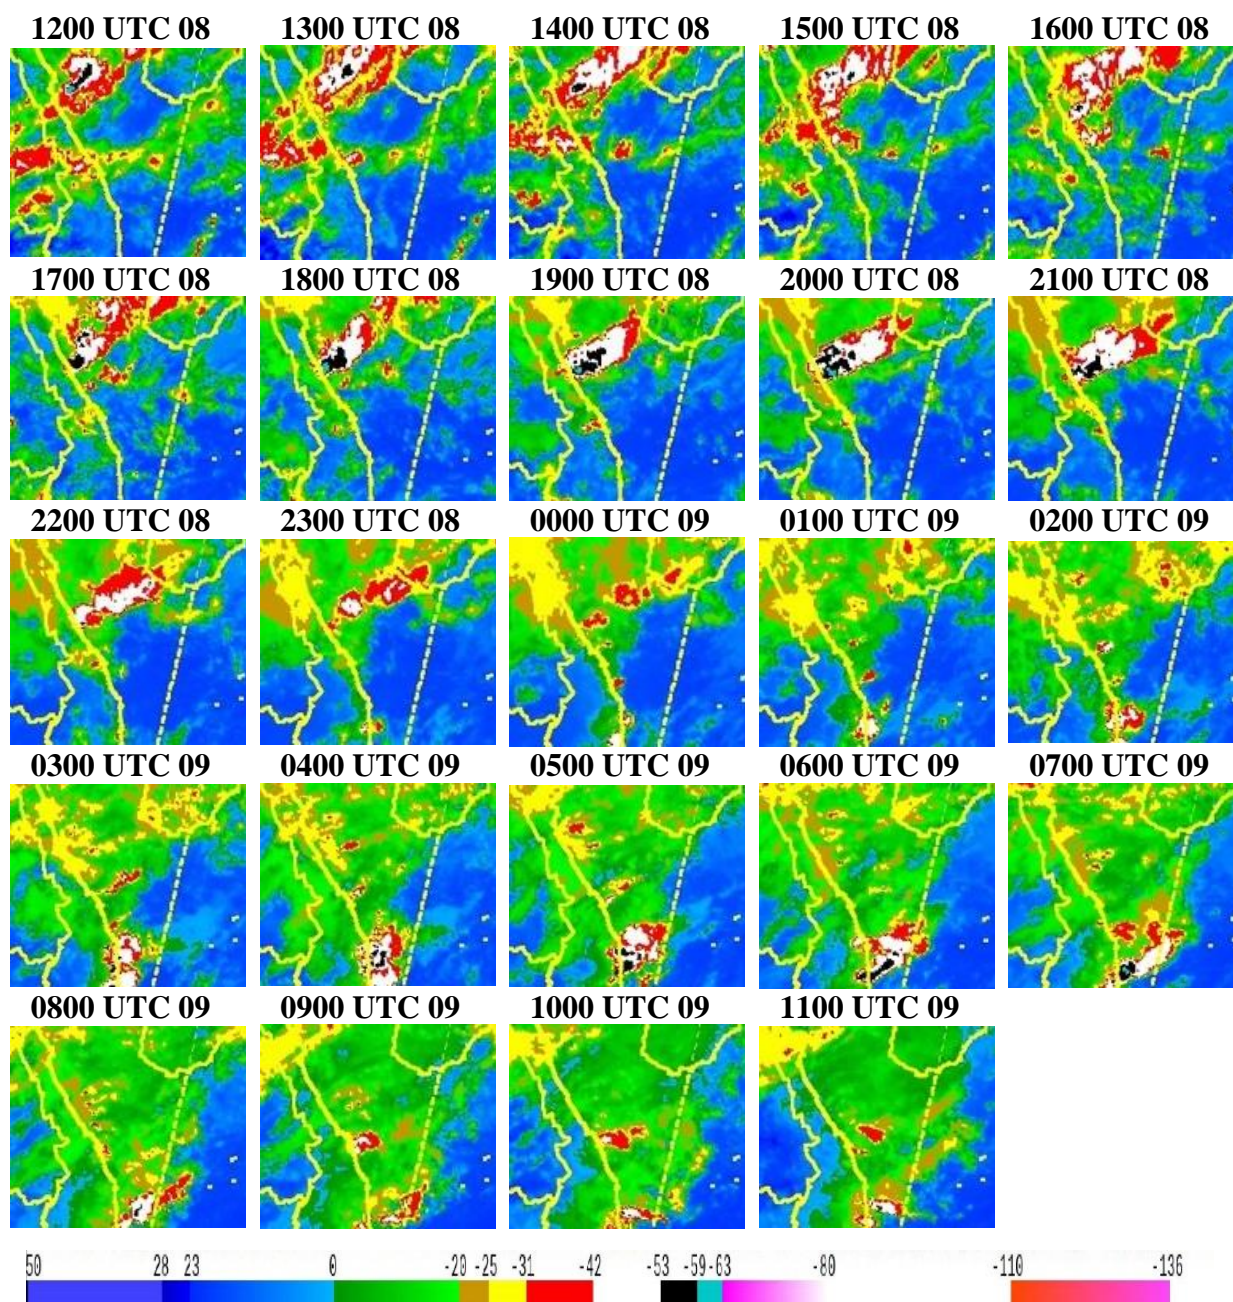

**Figure S1.** Color-enhanced infrared imageries of blackbody cloud-top temperatures (°C, scale at bottom) over central Vietnam from the Himawari satellite at 1-h intervals from 1200 UTC 8 to 1100 UTC 9 Dec 2018.

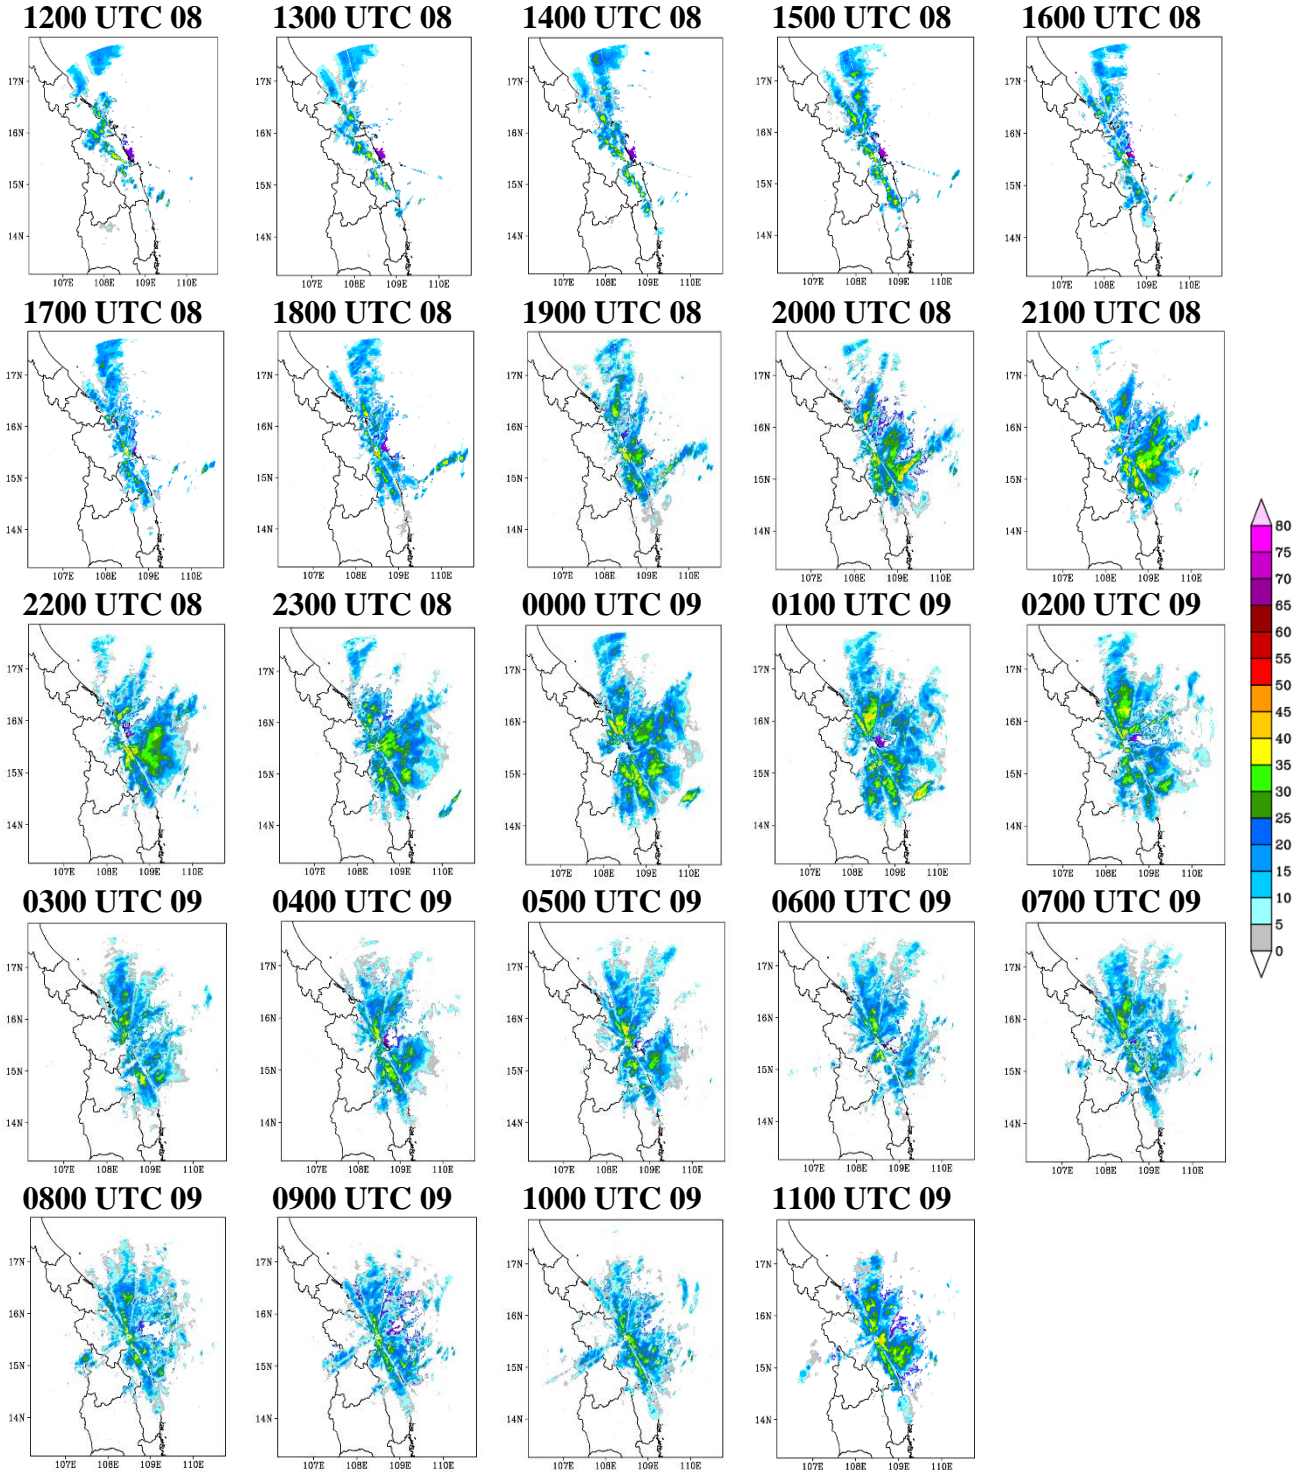

**Figure S2.** Column-maximum radar reflectivity (dBZ) over central Vietnam at 1-h intervals from 1200 UTC 8 to 1100 UTC 9 December 2018.



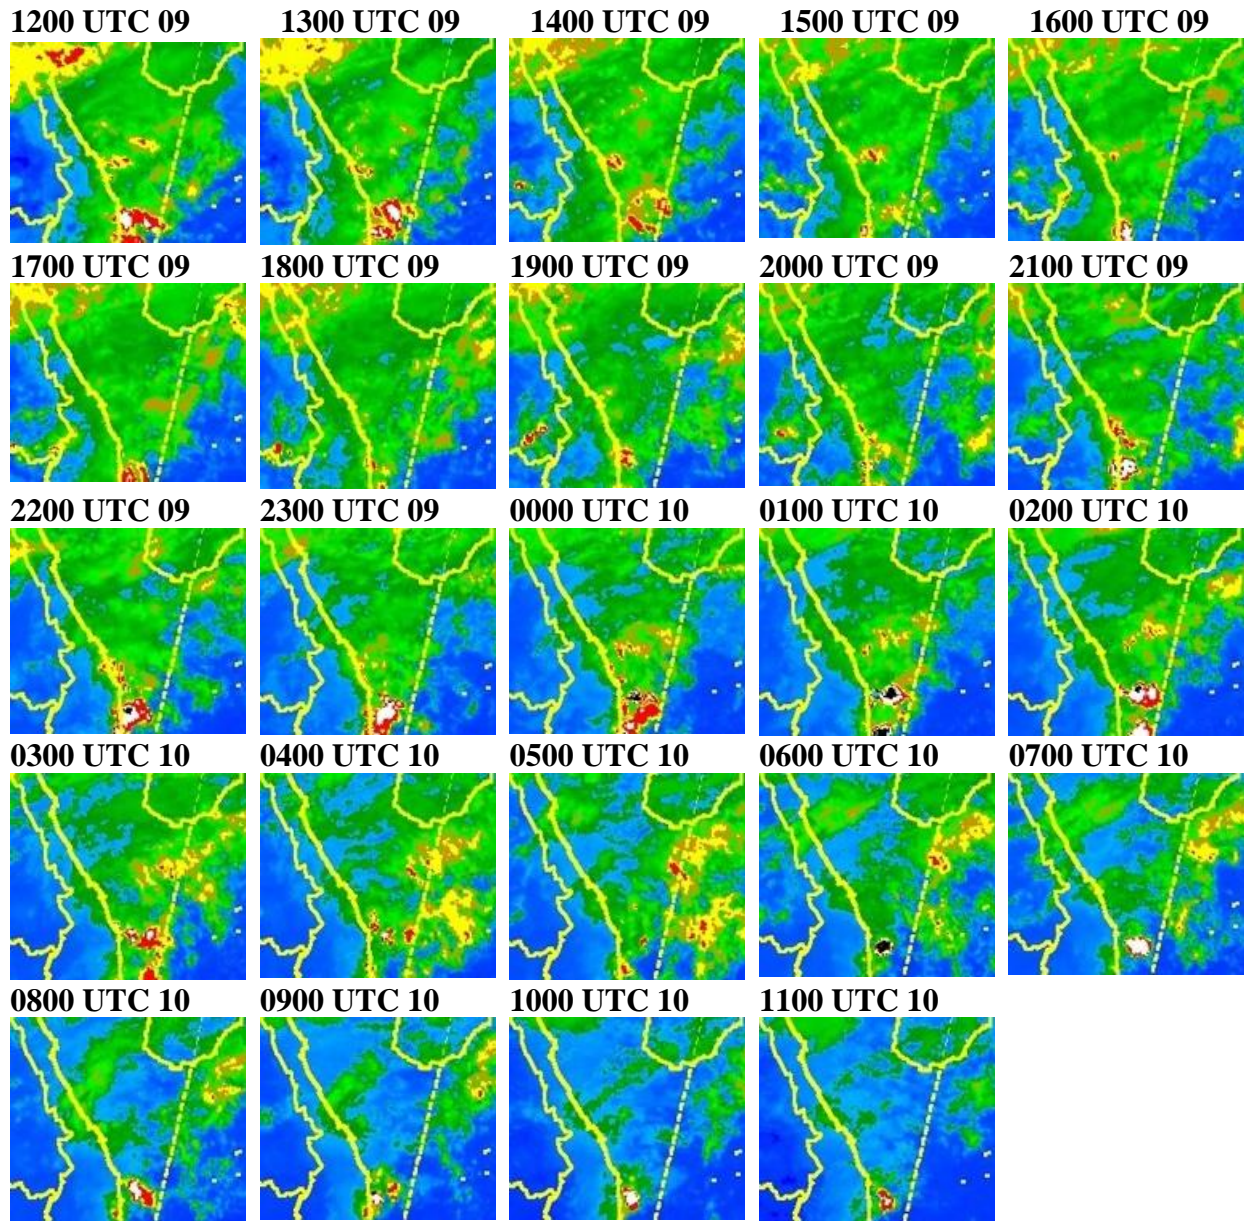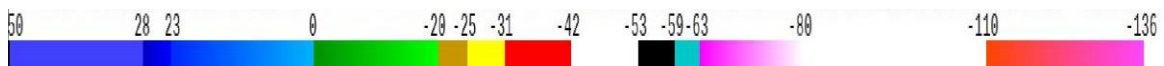

**Figure S3.** As in Fig. S1, except from 1200 UTC 9 to 1100 UTC 10 Dec 2018.

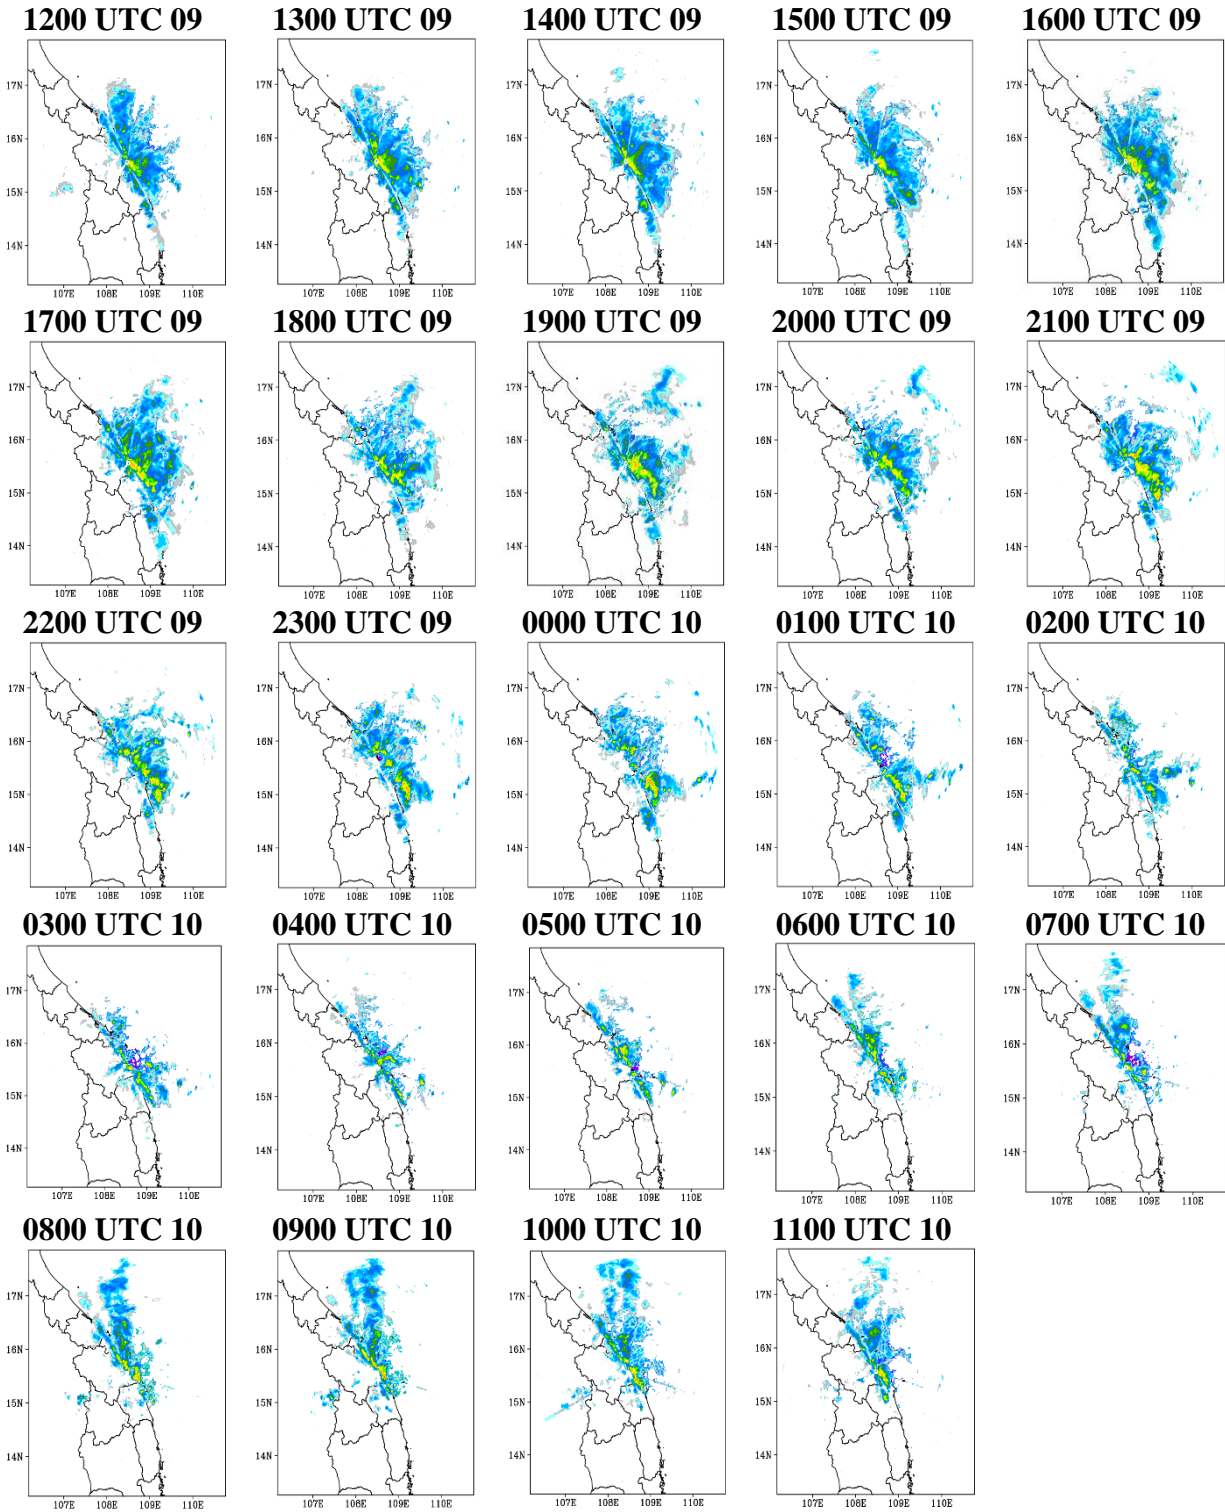

**Figure S4.** As in Fig. S2, except from 1200 UTC 9 to 1100 UTC 10 Dec 2018.



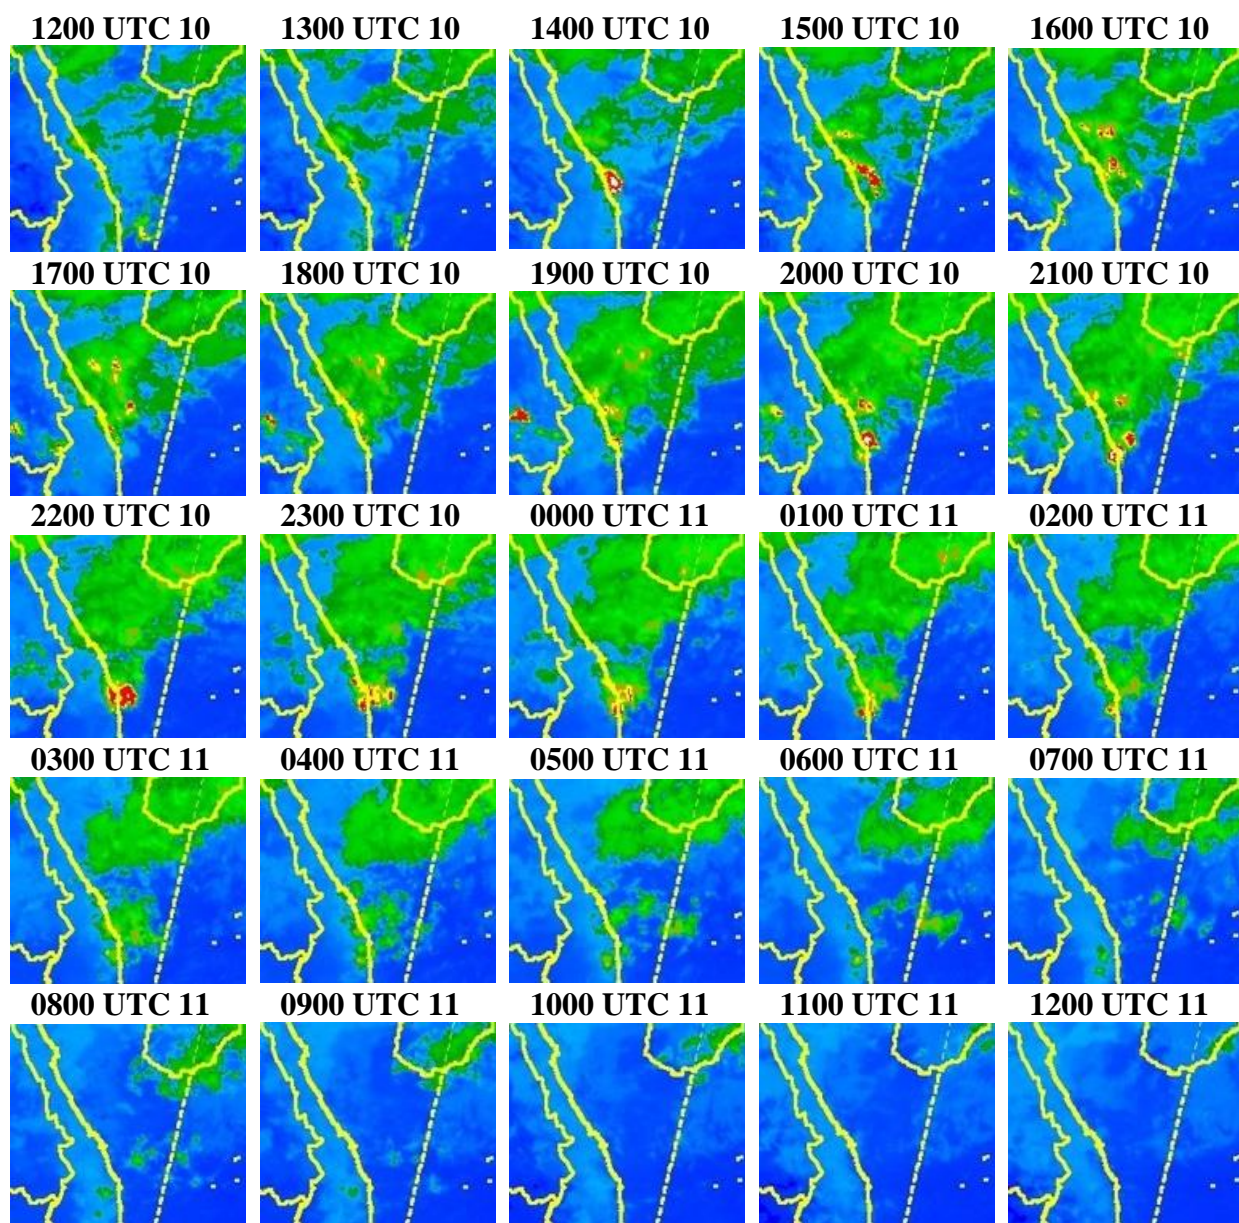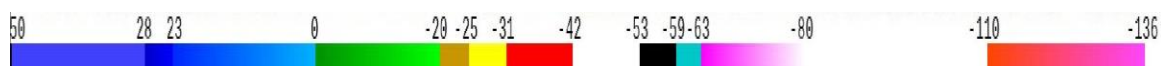

**Figure S5.** As in Fig. S1, except from 1200 UTC 10 to 1200 UTC 11 Dec 2018.

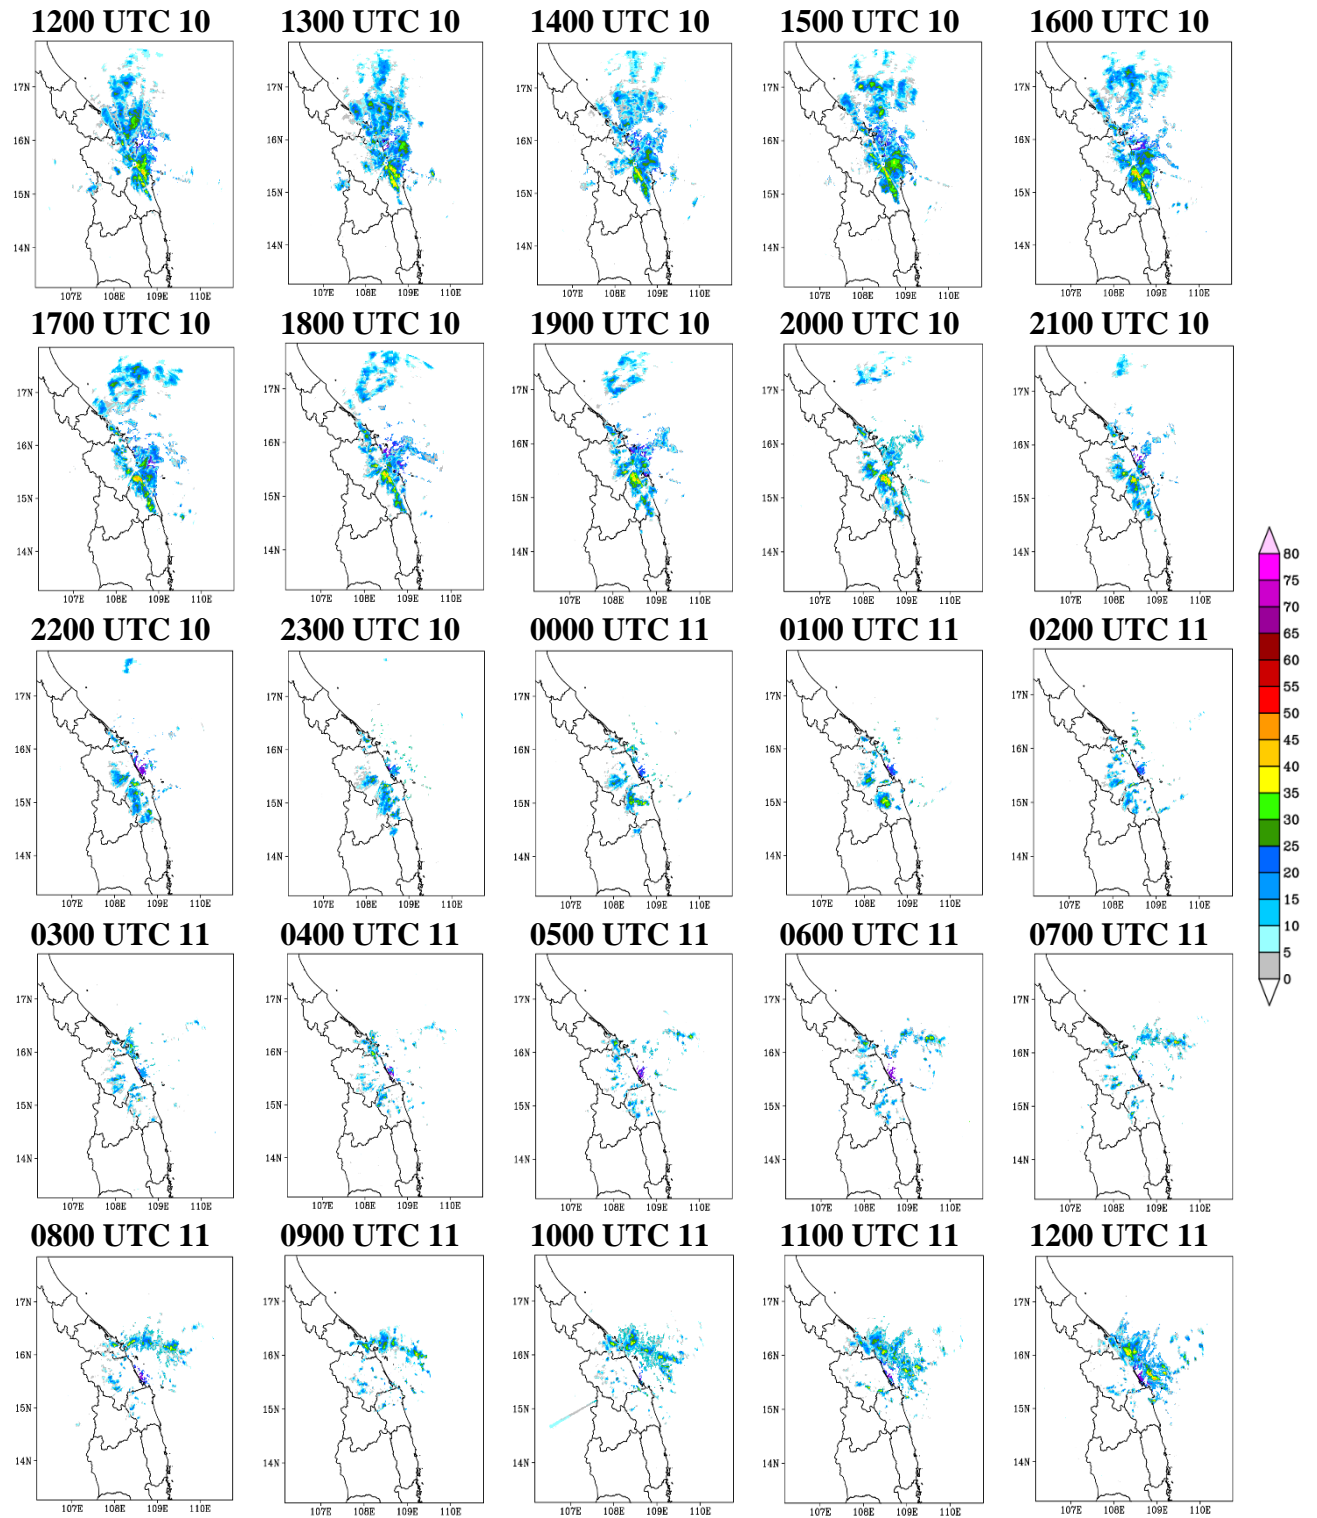

**Figure S6.** As in Fig. S2, except from 1200 UTC 10 to 1200 UTC 10 Dec 2018.
